# Supplementary material for: Molecular Longitudinal Tracking of Mycobacterium abscessus spp. during Chronic Infection of the Human Lung
Source: PubMed Central journal article supplement (PMC3655965; doi:10.1371/journal.pone.0063237), 2013-05-16
Supplement: pone.0063237.s001.pdf [file pone.0063237.s001.pdf]

**Table S1. Clarithromycin, Cefoxitin and Amikacin MICs determined for isolates from Patient 1**

| Clarithromycin MIC ( $\mu\text{g/ml}$ ) |       |       |       |       |        |        |
|-----------------------------------------|-------|-------|-------|-------|--------|--------|
|                                         | Day 5 | Day 6 | Day 8 | Day 9 | Day 12 | Day 14 |
| ED1-1                                   | 8     | > 16  | > 16  | > 16  | > 16   | > 16   |
| ED1-2                                   | 8     | > 16  | > 16  | > 16  | > 16   | > 16   |
| ED1-3S                                  | 8     | > 16  | > 16  | > 16  | > 16   | > 16   |
| ED1-3R                                  | 4     | 8     | > 16  | > 16  | > 16   | > 16   |
| ED1-4S                                  | 8     | > 16  | > 16  | > 16  | > 16   | > 16   |
| ED1-4R                                  | 8     | > 16  | > 16  | > 16  | > 16   | > 16   |

  

| Cefoxitin MIC ( $\mu\text{g/ml}$ ) |       |       |       |       |        |        |
|------------------------------------|-------|-------|-------|-------|--------|--------|
|                                    | Day 5 | Day 6 | Day 8 | Day 9 | Day 12 | Day 14 |
| ED1-1                              | 32    | 64    | 64    | 64    | 64     | 128    |
| ED1-2                              | 128   | 128   | 128   | 128   | 128    | 128    |
| ED1-3S                             | 64    | 128   | 128   | 128   | 128    | 128    |
| ED1-3R                             | 128   | 128   | 128   | 128   | 128    | 128    |
| ED1-4S                             | 64    | 128   | 128   | 128   | >128   | >128   |
| ED1-4R                             | 128   | 128   | 128   | 128   | >128   | >128   |

  

| Amikacin MIC ( $\mu\text{g/ml}$ ) |       |       |       |       |        |        |
|-----------------------------------|-------|-------|-------|-------|--------|--------|
|                                   | Day 5 | Day 6 | Day 8 | Day 9 | Day 12 | Day 14 |
| ED1-1                             | 8     | 32    | 32    | 32    | 32     | 32     |
| ED1-2                             | 16    | 32    | 32    | 32    | 32     | 32     |
| ED1-3S                            | 32    | 32    | 32    | 32    | 32     | 32     |
| ED1-3R                            | 32    | 32    | 32    | 32    | 32     | 32     |
| ED1-4S                            | 8     | 16    | 16    | 16    | 32     | 32     |
| ED1-4R                            | 16    | 32    | 32    | 32    | 32     | 32     |

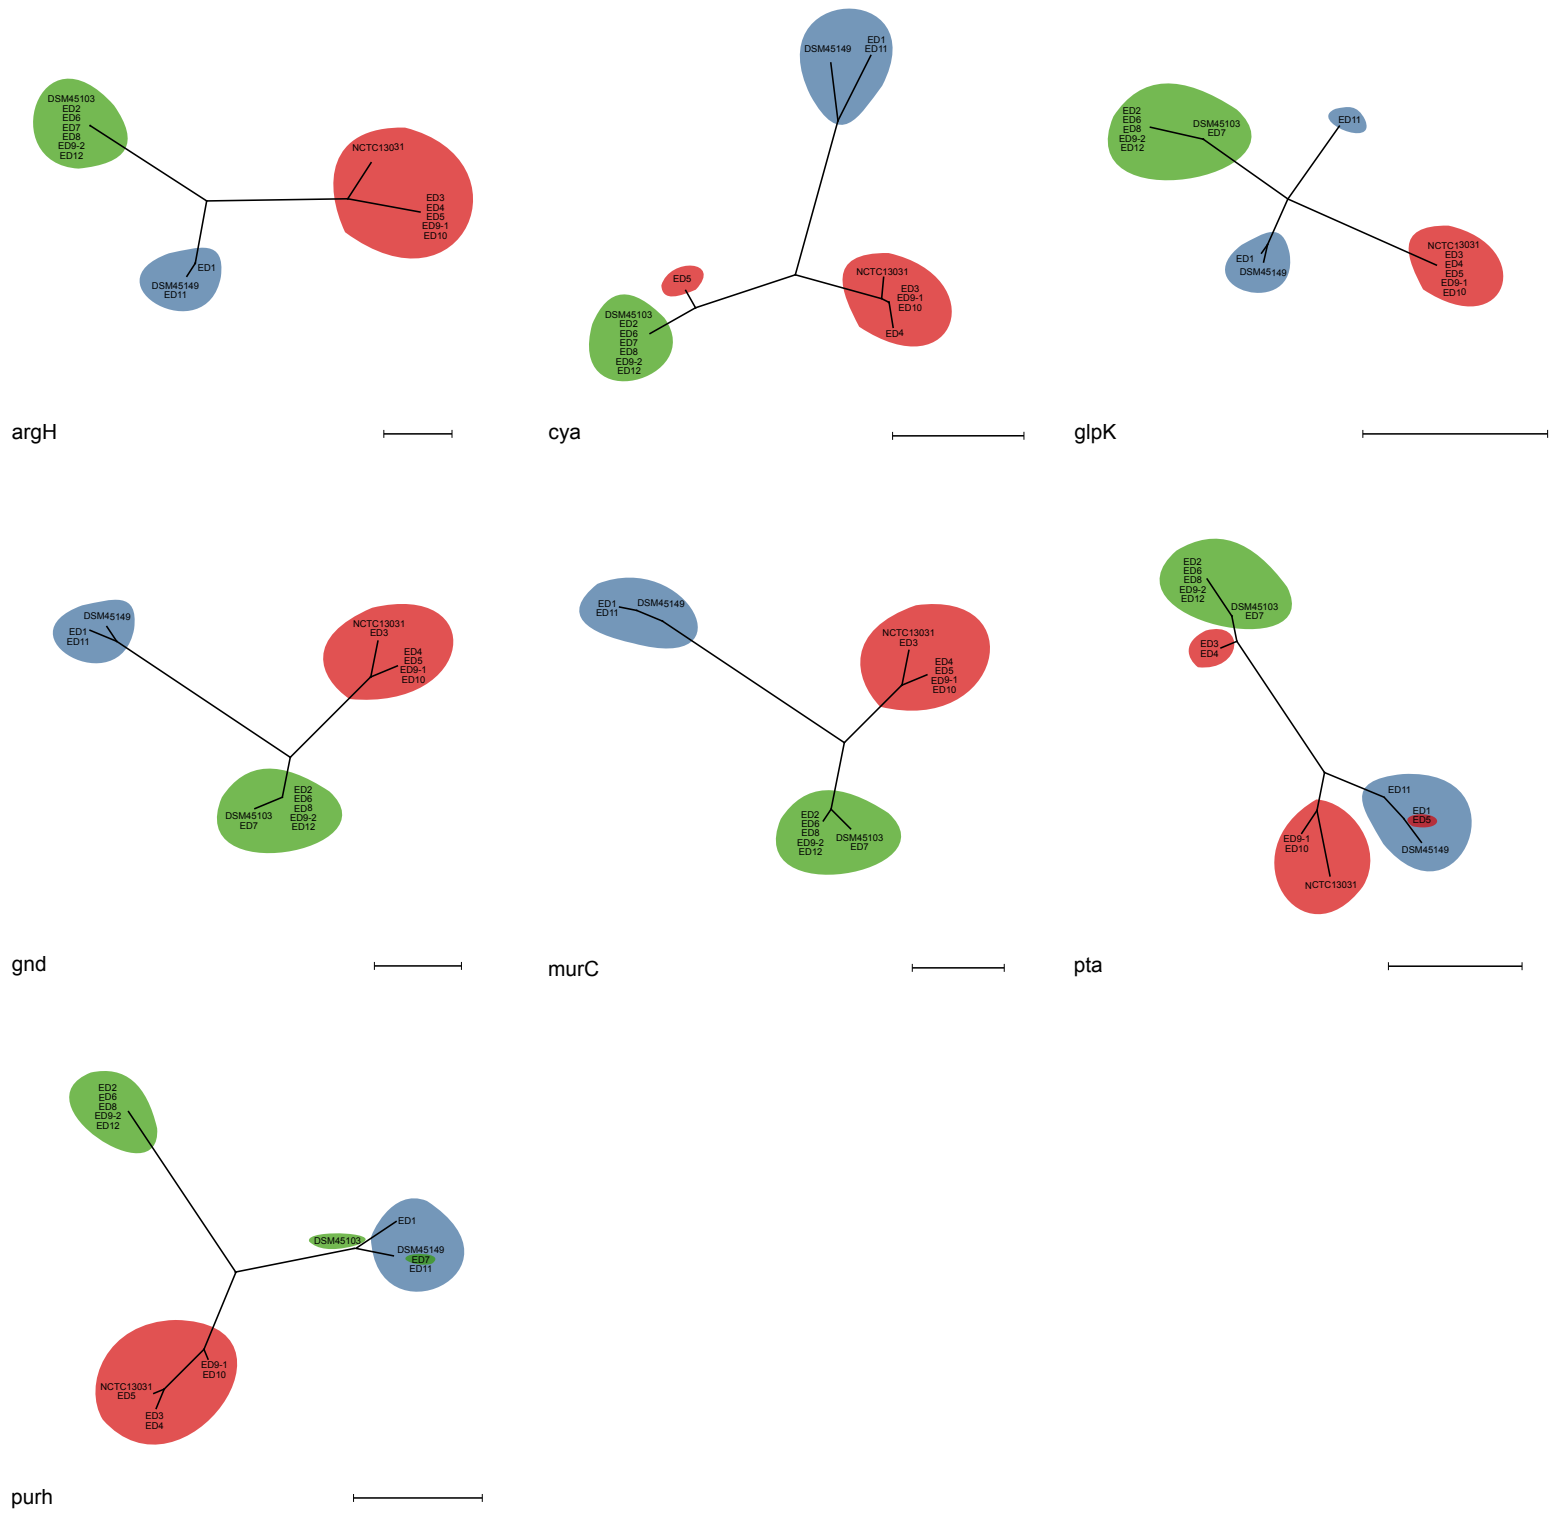

**Fig. S1. Single gene trees of individual MLST alleles.** Neighbour-joining phylogenies for 13 clinical isolates and type strains *M. abscessus* NCTC 13031, *M. bolletii* DSM 45149 and *M. massiliense* DSM 45103. Scale bar represents 0.01 substitutions per site. *M. abscessus*, *M. bolletii* and *M. massiliense* strains are highlighted in red, green and blue respectively.
